1 **Identification of 2019-nCoV related coronaviruses in Malayan pangolins in**  
2 **southern China**

3

4 Tommy Tsan-Yuk Lam<sup>1,2</sup>, Marcus Ho-Hin Shum<sup>2</sup>, Hua-Chen Zhu<sup>1,2</sup>, Yi-Gang Tong<sup>3</sup>, Xue-  
5 Bing Ni<sup>2</sup>, Yun-Shi Liao<sup>2</sup>, Wei Wei<sup>4</sup>, William Yiu-Man Cheung<sup>2</sup>, Wen-Juan Li<sup>3</sup>, Lian-Feng  
6 Li<sup>4</sup>, Gabriel M Leung<sup>2</sup>, Edward C. Holmes<sup>5</sup>, Yan-Ling Hu<sup>4\*</sup>, Yi Guan<sup>1,2\*</sup>

7

8 <sup>1</sup> Joint Institute of Virology (Shantou University / The University of Hong Kong) &  
9 Guangdong-Hongkong Joint Laboratory of Emerging Infectious Diseases, Shantou  
10 University, Shantou, Guangdong, 515063, P. R. China.

11 <sup>2</sup> State Key Laboratory of Emerging Infectious Diseases, School of Public Health, The  
12 University of Hong Kong, Hong Kong SAR, P. R. China.

13 <sup>3</sup> Beijing Advanced Innovation Center for Soft Matter Science and Engineering (BAIC-SM),  
14 College of Life Science and Technology, Beijing University of Chemical Technology,  
15 Beijing, 100029, P. R. China.

16 <sup>4</sup> Life Sciences Institute, Guangxi Medical University, Nanning, Guangxi, 530021, P. R.  
17 China.

18 <sup>5</sup> Marie Bashir Institute for Infectious Diseases and Biosecurity, School of Life and  
19 Environmental Sciences and School of Medical Sciences, The University of Sydney, Sydney,  
20 Australia.

21

22 \* Corresponding authors:

23 Prof. Yi Guan, State Key Laboratory of Emerging Infectious Diseases, School of Public  
24 Health, The University of Hong Kong, Hong Kong SAR, P. R. China; Email: [yguan@hku.hk](mailto:yguan@hku.hk).

25 Prof. Yan-Ling Hu, Life Sciences Institute, Guangxi Medical University, Nanning, Guangxi  
26 530021, China; Email: [huyanling@gxmu.edu.cn](mailto:huyanling@gxmu.edu.cn).

27 **Abstract**

28 The ongoing outbreak of viral pneumonia in China and beyond is associated with a novel  
29 coronavirus, provisionally termed 2019-nCoV. This outbreak has been tentatively associated  
30 with a seafood market in Wuhan, China, where the sale of wild animals may be the source of  
31 zoonotic infection. Although bats are likely reservoir hosts for 2019-nCoV, the identity of  
32 any intermediate host facilitating transfer to humans is unknown. Here, we report the  
33 identification of 2019-nCoV related coronaviruses in pangolins (*Manis javanica*) seized in  
34 anti-smuggling operations in southern China. Metagenomic sequencing identified pangolin  
35 associated CoVs that belong to two sub-lineages of 2019-nCoV related coronaviruses,  
36 including one very closely related to 2019-nCoV in the receptor-binding domain. The  
37 discovery of multiple lineages of pangolin coronavirus and their similarity to 2019-nCoV  
38 suggests that pangolins should be considered as possible intermediate hosts for this novel  
39 human virus and should be removed from wet markets to prevent zoonotic transmission.

## 40 Text

41 An outbreak of serious pneumonia disease was reported in Wuhan, China on 30 December  
42 2019. The causative agent was soon identified as a novel coronavirus - 2019-nCoV<sup>1</sup>. Case  
43 numbers grew rapidly from 27 in December 2019 to 7,818 globally as of 30 January 2020<sup>2</sup>,  
44 leading to the WHO to declare a public health emergency. Many of the early cases were  
45 linked to Huanan seafood market in Wuhan city, Hubei province, from where the probable  
46 zoonotic source is speculated to originate<sup>3</sup>. Currently, only environmental samples taken from  
47 the market have been reported as positive for 2019-nCoV by the China CDC<sup>4</sup>. However, as  
48 similar wet markets were already implicated in the SARS outbreak of 2002-2003<sup>5</sup>, it seems  
49 likely that wild animals are also involved in the emergence of 2019-nCoV. Indeed, a number  
50 of non-aquatic mammals were available for purchase in the Huanan seafood market prior to  
51 the outbreak<sup>4</sup>. Unfortunately, because the market was cleared soon after the outbreak began,  
52 determining the source virus in the wild animals from the market is challenging. Although a  
53 coronavirus closely related to 2019-nCoV sampled from a *Rhinolophus affinis* bat in Yunnan  
54 in 2013 has now been identified<sup>6</sup>, closely related viruses have not yet been detected in other  
55 wildlife species. Here, we present the identification of 2019-nCoV related viruses in  
56 pangolins smuggled into southern China.

57

58 We investigated the virome composition of pangolins (mammalian order Pholidota). These  
59 animals are of growing importance and interest because they are the most illegally trafficked  
60 of any group of mammal: they are used as both a food source and their scales are utilized in  
61 traditional Chinese medicine. A number of pangolin species now are regarded as critically  
62 endangered on the International Union for Conservation of Nature Red List of Threatened  
63 Species. We received frozen tissue (lungs, intestine, blood) samples that were collected from  
64 18 Malayan pangolins (*Manis javanica*) during August 2017-January 2018. These pangolins  
65 were obtained during the anti-smuggling operations by Guangxi Customs. Strikingly, high-  
66 throughput sequencing of their RNA revealed the presence of coronaviruses in six (two lung,  
67 two intestine, one lung-intestine mix, one blood) of 43 samples. With the sequence read data,  
68 and by filling gaps with amplicon sequencing, we were able to obtain six full or nearly full  
69 genome sequences - denoted GX/P1E, GX/P2V, GX/P3B, GX/P4L, GX/P5E and GX/P5L -  
70 that fall into the 2019-nCoV lineage (within the genus *Betacoronavirus*) in a phylogenetic  
71 analysis (Figure 1a). These viruses also have similar genomic organization as 2019-nCoV,  
72 with nine predicted open reading frames (Figure 1b; Extended Data Table S5). We were also  
73 able to successfully isolate the virus using the Vero E6 cell line (Extended Data Figure S1).

74 Based on these new genome sequences, we designed primers for qPCR detection to confirm  
75 that the raw samples were positive for the coronavirus. We conducted further qPCR testing  
76 on another batch of archived pangolin samples collected between May-July 2018. Among the  
77 19 samples (nine intestine tissues, ten lung tissues) tested from 12 animals, three lung tissue  
78 samples were coronavirus positive.

79

80 In addition to the animals from Guangxi, after the start of the 2019-nCoV outbreak the  
81 Guangzhou Customs Technology Center re-examined their five archived pangolin samples  
82 (two skin swabs, one unknown tissue, one scale) obtained in previous anti-smuggling  
83 operations in March 2019. Following high-throughput sequencing the scale sample was  
84 found to contain coronavirus reads, and from these data we were able to assemble a partial  
85 genome sequence of 21,505bp (denoted as GD/P2S), representing approximately 72% of the  
86 2019-nCoV genome. This virus sequence on the scale may in fact come from contaminants of  
87 other infected pangolin tissues. Notably, another study of diseased pangolins in Guangdong  
88 performed in 2019 also identified viral contigs from lung samples that were similarly related  
89 to 2019-nCoV<sup>7</sup>. Different assembly methods and manual curation were performed to generate  
90 a partial genome sequence that comprised about 86.3% of the full-length virus genome  
91 (denoted as GD/P1L in the Figure 1a tree).

92

93 These novel pangolin coronavirus genomes have approximately 85.5% to 92.4% similarity to  
94 2019-nCoV, and represent two sub-lineages of 2019-nCoVs in the phylogenetic tree, one of  
95 which (GD/P1L and GDP2S) is extremely closely related to 2019-nCoV (Figure 1; red  
96 circles). It has previously been noted that members of the subgenus *Sarbecovirus* have  
97 experienced widespread recombination<sup>8</sup>. In support of this, a recombination analysis  
98 performed here revealed that bat coronaviruses ZC45 and ZCS21 are likely recombinants,  
99 containing genome fragments from multiple SARS-CoV related lineages (genome regions 2,  
100 5, 7) and 2019-nCoV related lineages including that from pangolins (regions 1, 3, 4, 6, 8).

101

102 More notable, however, was the observation of putative recombination signals between the  
103 pangolins coronaviruses, bat coronaviruses RaTG13, and human 2019-nCoV (Figure 1c, d).  
104 In particular, 2019-nCoV exhibits very high sequence similarity to the Guangdong pangolin  
105 coronaviruses in the receptor-binding domain (RBD; 97.4% amino acid similarity; indicated  
106 by red arrow in Figure 1c and Figure 2a), even though it is most closely related to bat  
107 coronavirus RaTG13 in the remainder of the viral genome. Bat CoV RaTG and the human

108 2019-nCoV have only 89.2% amino acid similarity in RBD. Indeed, the Guangdong pangolin  
109 coronaviruses and 2019-nCoV possess identical amino acids at the five critical residues of the  
110 RBD, whereas RaTG13 only shares one amino acid with 2019-nCoV (residue 442, human  
111 SARS-CoV numbering<sup>9</sup>). Interestingly, a phylogenetic analysis of synonymous sites alone in  
112 the RBD revealed that the phylogenetic position of the Guangdong pangolin is consistent  
113 with that in the remainder of the viral genome, rather than being the closest relative of 2019-  
114 nCoV (Figure 2b). Hence, it is possible that the amino acid similarity between the RBD of  
115 the Guangdong pangolin coronaviruses and 2019-nCoV is due to selectively-mediated  
116 convergent evolution rather than recombination, although it is difficult to choose between  
117 these scenarios on current data. Although the drivers of any convergent evolution are  
118 unknown, its possible occurrence, as well as that of recombination, would further highlight  
119 the role played by intermediate animal hosts in human virus emergence.

120

121 To date, pangolins are the only mammals other than bats documented to be infected by a  
122 2019-nCoV related coronavirus. It is striking that two related lineages of CoVs are found in  
123 pangolins and that both are also related to 2019-nCoV. This suggests that these animals may  
124 be long-term reservoir hosts for these viruses, which is surprising as pangolins are solitary  
125 animals with relatively small population sizes, reflecting their endangered status<sup>10</sup>. However,  
126 it cannot be excluded that pangolins acquired their 2019-nCoV related viruses independently  
127 from bats or another animal host. It is also notable that both lineages of pangolin  
128 coronaviruses were obtained from trafficked Malayan pangolins, likely originating from  
129 Southeast Asia, and there is a marked lack of knowledge of the viral diversity maintained by  
130 this animal in regions where it is indigenous. Undoubtedly, the extent of virus transmission in  
131 pangolin populations requires additional investigation, but the repeated occurrence of  
132 infections with 2019-nCoV related coronaviruses in Guangxi and Guangdong provinces  
133 suggests that this animal may be a potentially important host in coronavirus emergence.

134

135 Coronaviruses, including those related to 2019-nCoV, are clearly present in many wild  
136 mammals in Asia<sup>5,6,7,11</sup>. Although the epidemiology, pathogenicity, interspecies infectivity  
137 and transmissibility of coronaviruses in pangolins remains to be studied, the data presented  
138 here strongly suggests that handling these animals requires considerable caution, and that  
139 their sale in wet markets should be strictly prohibited. Further surveillance on pangolins in  
140 the natural environment in China and Southeast Asia are clearly needed to understand their  
141 role in the emergence of 2019-nCoV and the risk of future zoonotic transmission.

142 **Methods**

143 **Ethics Statement**

144 The animals studied here were rescued and treated by the Guangxi Zhuang Autonomous  
145 Region Terrestrial Wildlife Medical-aid and Monitoring Epidemic Diseases Research Center  
146 under the ethics approval (wild animal treatment regulation No. [2011] 85). The samples  
147 were collected following the procedure guideline (Pangolins Rescue Procedure, November,  
148 2016).

149

150 **Sample collection, viral detection and sequencing of pangolins in Guangxi**

151 We received frozen tissue samples of 18 pangolins (*Manis javanica*) from Guangxi Medical  
152 University, China, which were collected between August 2017 – January 2018. These  
153 pangolins were seized by the Guangxi Customs during their routine anti-smuggling  
154 operations. All animal individuals comprised samples from multiple organs including lungs,  
155 intestine and blood, with the exception of six individuals for which only lung tissues were  
156 available, five with mixed intestine and lung tissues only, one with intestine tissues only, and  
157 one comprising two blood samples. Using the intestine-lung mixed sample we were able to  
158 isolate a novel *Betacoronavirus* using the Vero-E6 cell line (Extended Data Figure S1). A  
159 High Pure Viral RNA Kit (Roche, Switzerland) was used for RNA extraction on all 43  
160 samples. For RNA sequencing, a sequencing library was constructed using an Ion Total  
161 RNA-Seq Kit v2 (Thermo Fisher Scientific, MA, USA), and the library was subsequently  
162 sequenced using an Ion Torrent S5 sequencer (Thermo Fisher Scientific). Reverse  
163 Transcription was performed using an SuperScript III First-Strand Synthesis System for RT-  
164 PCR (Thermo Fisher Scientific, MA, USA). DNA libraries were constructed using the  
165 NEBNext Ultra II DNA Library Prep Kit and sequenced on a MiSeq sequencer. The NGS  
166 QC Toolkit V2.3.3 was used to remove low-quality and short reads. Both BLASTn and  
167 BLASTx were used to search against a local virus database, utilizing the data available at  
168 NCBI/GenBank. Genome sequences were assembled using the CLC Genomic Workbench  
169 v.9.0. To fill gaps in high throughput sequencing and obtain the whole viral genome  
170 sequence, amplicon primers based on the bat SARS-like coronavirus ZC45 (GenBank  
171 accession number MG772933) sequence were designed for amplicon-based sequencing.

172

173 A total of six samples (including the virus isolate) contained reads that matched a  
174 *Betacoronavirus* (Extended Data Table S1). We obtained near complete genomes from these  
175 samples (98%, compared to 2019-nCoV), with the virus genomes denoted as GX/P1E,

176 GX/P2V, GX/P3B, GX/P4L, GX/P5E and GX/P5L. Based on these genome sequences, we  
177 designed primers for qPCR to confirm the positivity of the original tissue samples (Extended  
178 Data Table S4). This revealed an original lung tissue sample that was also qPCR positive, in  
179 addition to the six original samples with coronavirus reads. We further tested an addition 19  
180 samples (nine intestine tissues, ten lung tissues), from 12 smuggled pangolins sampled  
181 between May-July 2018 by the group from Guangxi Medical University. The genome  
182 sequences of GX/P1E, GX/P2V, GX/P3B, GX/P4L, GX/P5E and GX/P5L were submitted to  
183 GenBank and GISAID databases, their accession numbers will be available as soon as it is  
184 generated.

185

### 186 **Sample collection, viral detection and sequencing of pangolins in Guangdong**

187 After the start of the 2019-nCoV outbreak, the Guangzhou Customs Technology Center re-  
188 examined their five archived pangolin samples (two skin swabs, one unknown tissue, one  
189 scale) obtained in anti-smuggling operations undertaken in March 2019. RNA was extracted  
190 from all five samples (Qiagen, USA), and was subjected to high-throughput RNA sequencing  
191 on the Illumina HiSeq platform by Vision medicals, Guangdong, China. The scale sample  
192 was found to contain coronavirus reads using BLAST methods. These reads were quality  
193 assessed, cleaned and assembled into contigs by both *de novo* (MEGAHIT v1.1.3<sup>12</sup>) and  
194 using reference (BWA v0.7.13<sup>13</sup>) assembly methods, with BetaCoV/Wuhan/WIV04/2019 as  
195 reference. The contigs were combined, and approximately 72% of the coronavirus genome  
196 (21,505bp) was obtained. This sequence was denoted as pangolin CoV GD/P2S.

197

198 Liu *et al.* recently published a meta-transcriptomic study of pangolins<sup>7</sup> and deposited 21  
199 RNA-seq raw files on the SRA database (<https://www.ncbi.nlm.nih.gov/sra>). We screened  
200 these raw read files using BLAST methods and found that five (SRR10168374,  
201 SRR10168376, SRR10168377, SRR10168378 and SRR10168392) contained reads that  
202 mapped to 2019-nCoV. These reads were subjected to quality assessment, cleaning and then  
203 *de novo* assembly using MEGAHIT<sup>12</sup> and reference assembly using BWA<sup>13</sup>. These reads  
204 were then merged and curated in a pileup alignment file to obtain the consensus sequences.  
205 This combined consensus sequence is 25,753bp in length (about 86.3% of  
206 BetaCoV/Wuhan/WIV04/2019) and denoted pangolin CoV GD/P1L. Notably, it has 66.8%  
207 overlap and only 0.21% divergence (i.e. a sequence identity of 99.79%) with the GD/P2S  
208 sequence. Since their genetic difference is so low, for the recombination analysis we merged

209 the GD/P1L and GD/P2S sequences into a single consensus sequence to minimize gap  
210 regions within any sequences.

211

212 The viral genome organizations of Guangxi and Guangdong pangolin coronaviruses were  
213 similar to 2019-nCoV. They had a total number of 9 open reading frames (ORFs) and shared  
214 the same gene order of ORF1ab replicase, envelope glycoprotein spike (S), envelope (E),  
215 membrane (M), nucleocapsid (N), plus other predicted ORFs. Detailed comparison of the  
216 ORF length and similarity with 2019-nCoV and bat coronavirus RaTG13 is provided in  
217 Extended Table S5.

218

### 219 **Sequence, phylogenetic and recombination analyses**

220 The human 2019-nCoV and bat RaTG13 coronavirus genome sequences were downloaded  
221 from Virological.org (<http://virological.org>) and the GISAID (<https://www.gisaid.org>)  
222 databases on 17 January 2020, with the data kindly shared by the submitters (Extended Data  
223 Table S2). Other coronaviruses (subgenus *Sarbecovirus*) were downloaded from GenBank  
224 (Extended Data Table S3) and compared to those obtained here. We constructed a multiple  
225 sequence alignment of their complete genomes and individual genes using MAFFT v7.273<sup>14</sup>.  
226 Maximum likelihood phylogenies were estimated using PhyML v3.1<sup>15</sup>, utilizing the  
227 GTR+I+ $\Gamma$  model of nucleotide substitution with 1,000 bootstrap replicates. To investigate  
228 potential recombination events, we implemented a window sliding approach to determine the  
229 changing patterns of sequence similarity and phylogenetic clustering between the query and  
230 the reference sequences, as well as a scanning of phylogenetic clusters performed directly  
231 from the multiple sequence alignment. Maximum likelihood trees were estimated from each  
232 window extraction (i.e. genome regions 1 to 8) using PhyML as described above.



233 **References:**

- 234 1. Wu, F. *et al.* A new coronavirus associated with human respiratory disease in China.  
235 *Nature* (2020). <https://doi.org/10.1038/s41586-020-2008-3>.
- 236 2. World Health Organization. WHO Novel Coronavirus (2019-nCoV) situation reports.  
237 <https://www.who.int/emergencies/diseases/novel-coronavirus-2019/situation-reports/>
- 238 3. Lu, R. *et al.* Genomic characterisation and epidemiology of 2019 novel coronavirus:  
239 implications for virus origins and receptor binding. *Lancet*, (2020). doi:10.1016/S0140-  
240 6736(20)30251-8.
- 241 4. Cohen, J. Mining coronavirus genomes for clues to the outbreak's origins. *Science*,  
242 (2020) [https://www.sciencemag.org/news/2020/01/mining-coronavirus-genomes-clues-](https://www.sciencemag.org/news/2020/01/mining-coronavirus-genomes-clues-outbreak-s-origins)  
243 [outbreak-s-origins](https://www.sciencemag.org/news/2020/01/mining-coronavirus-genomes-clues-outbreak-s-origins).
- 244 5. Wang, M. *et al.* SARS-CoV infection in a restaurant from palm civet. *Emerg Infect Dis*  
245 11:1860-5, (2005).
- 246 6. Zhou, P. *et al.* A pneumonia outbreak associated with a new coronavirus of probable bat  
247 origin. *Nature* (2020). <https://doi.org/10.1038/s41586-020-2012-7>.
- 248 7. Liu, P. *et al.* Viral Metagenomics Revealed Sendai Virus and Coronavirus Infection of  
249 Malayan Pangolins (*Manis javanica*). *Viruses* 11, (2019).
- 250 8. Hon, C.C. *et al.* Evidence of the recombinant origin of a bat severe acute respiratory  
251 syndrome (SARS)-like coronavirus and its implications on the direct ancestor of SARS  
252 coronavirus. *J Virol* 82, 1819-1826, (2008).
- 253 9. Wan, Y. *et al.* Receptor recognition by novel coronavirus from Wuhan: An analysis  
254 based on decade-long structural studies of SARS. *J Virol* , (2020).
- 255 10. Heinrich, S. *et al.* The global trafficking of pangolins: A comprehensive summary of  
256 seizures and trafficking routes from 2010–2015. *Trafficking*, (2017).
- 257 11. Wang, W. *et al.* 2017. Discovery of a Highly Divergent Coronavirus in the Asian House  
258 Shrew from China Illuminates the Origin of the Alphacoronaviruses. *J Virol* 91, (2017).
- 259 *References associated in Methods only:*
- 260 12. Li, D. *et al.* MEGAHIT: an ultra-fast single-node solution for large and complex metagenomics  
261 assembly via succinct de Bruijn graph. *Bioinformatics* 31, 1674-1676, (2015).
- 262 13. Li, H. and Durbin, R. Fast and accurate long-read alignment with Burrows-Wheeler transform.  
263 *Bioinformatics* 26, 589-595, (2010).
- 264 14. Rozewicki, J. *et al.* MAFFT-DASH: integrated protein sequence and structural alignment.  
265 *Nucleic Acids Res* 47, W5-W10, (2019).

- 266 15. Guindon, S. *et al.* PHYML Online--a web server for fast maximum likelihood-based  
267 phylogenetic inference. *Nucleic Acids Res* 33, W557-559, (2010).

268

269 **Acknowledgements:**

270 We thank Prof. Wu-Chun Cao, Dr. Na Jia, Dr. Ya-Wei Zhang, Dr. Jia-Fu Jiang, Dr. Bao-Gui  
271 Jiang, and their team in State Key Laboratory of Pathogen and Biosecurity, Beijing Institute  
272 of Microbiology and Epidemiology, Beijing for their substantial contributions to this study,  
273 including coordinating among research parties, conducting virus isolation, qPCR and  
274 sequencing. We also thank Guangzhou Customs Technology Center, Guangzhou for re-  
275 examining their archived pangolin samples and providing the data. All the above persons  
276 agree on the content of the study, authorship arrangement and publication. We thank the staff  
277 of the Guangxi and Guangdong Custom Bureau for their laborious anti-smuggling operations.  
278 We thank all the scientists who kindly shared their genomic sequences of the coronaviruses  
279 used in this study.

280

281 This work was supported by research grants from National Key Plan for Scientific Research  
282 and Development of China (2016YFD0500302; 2017YFE0190800), funding for Guangdong-  
283 Hongkong-Macau Joint Laboratory (2019B121205009), The National Natural Science  
284 Foundation of China (NSFC) Excellent Young Scientists Fund (Hong Kong and Macau)  
285 (31922087), Li Ka Shing Foundation, National Institutes of Health (HHSN272201400006C),  
286 and the Australian Research Council (FL170100022).

287

288 **Author contributions:** Y.G. and Y.L.H. designed and supervised research. W.W., W.J.L.  
289 and L.F.L. collected samples and conducted genome sequencing. M.H.H.S, X.B.N. and  
290 T.T.Y.L. performed genome assembly and annotation. Y.G.T., T.T.Y.L., M.H.H.S, X.B.N,  
291 W.Y.M.C. and Y.S.L. performed genome analysis and interpretation. T.T.Y.L. and  
292 E.C.H. wrote the paper. H.C.Z., Y.L.H., G.M.L and Y.G. joined the data interpretation and  
293 edited the paper.

294

295 **Competing interests:** No conflict of interest declared.

296

297 **Materials & correspondence:**

298 Correspondence and requests for materials should be addressed to Prof. Yi Guan  
299 ([yguan@hku.hk](mailto:yguan@hku.hk))

300

301 **Data availability:**

302 Data that support the findings of this study have been deposited in GenBank database with  
303 the xxxx-xxxx accession codes and SRA database with xxxx-xxxx accession codes.

304 **Figure Legends**

305

306 **Figure 1.** Phylogenetic analyses depicting the evolutionary relationship between human  
307 2019-nCoV, the pangolin coronavirus sequences obtained in this study, and the other  
308 reference coronaviruses. The phylogenies were estimated using a maximum likelihood  
309 approach employing the GTR+I+ $\Gamma$  nucleotide substitution model and 1,000 bootstrap  
310 replicates. (A) Phylogeny of the subgenus *Sarbecovirus* (genus *Betacoronavirus*) estimated  
311 from the concatenated ORF1ab-S-E-M-N genes. Red circles indicate the pangolin  
312 coronavirus sequences generated in this study. Note that GD/P1L is the consensus sequence  
313 re-assembled from the raw data previously published<sup>7</sup>. (B) Genome organization of  
314 coronaviruses including the pangolin coronaviruses, with the predicted ORFs shown in  
315 different colors. (C) Sliding window analysis of changing patterns of sequence similarity  
316 between 2019-nCoV, pangolin coronaviruses and bat coronavirus RaTG13. The name of the  
317 query sequences are shown vertically on the right of the analysis boxes. The similarities to  
318 different reference sequences are indicated by different colors shown in the legend box at the  
319 top. Guangdong pangolin coronaviruses GD/P1L and GD/P2S were merged for this analysis.  
320 The blue arrows at the top indicate the position of the ORFs in the alignment analyzed. The  
321 potential recombination breakpoints are shown in pink dash lines, which together slice the  
322 genomes into eight regions (regions with <200bp were omitted; indicated by the red line at  
323 bottom) for phylogenetic analysis. (D) Phylogenetic trees of different genomic regions.  
324 SARS-CoV and 2019-nCoV related lineages are shown in blue and red tree branches. Branch  
325 scale bars are 0.1 substitutions/site.

326

327 **Figure 2.** (A) Sequence alignment showing the receptor-binding domain (RBD) in human,  
328 pangolin and bat coronaviruses. The five critical residues for binding between SARS-CoV  
329 RBD and human ACE2 protein are indicated in red boxes, and ACE2-contacting residues are  
330 indicated with yellow boxes, following Wan et al.<sup>9</sup>. Note that in Guangdong pangolin  
331 sequence, the codon positions coding for amino acid 337 proline, 420 aspartic acid, 499  
332 proline and 519 asparagine have ambiguous nucleotide compositions, resulting to possibly  
333 alternative amino acids threonine, glycine, threonine and lysine respectively. GD:  
334 Guangdong, GX: Guangxi. (B) Phylogenetic trees of 2019-nCoV related lineage estimated  
335 from the whole RBD region (upper) and synonymous sites only (lower). Branch supports  
336 obtained from 1,000 bootstrap replicates are shown.

# Figure 1

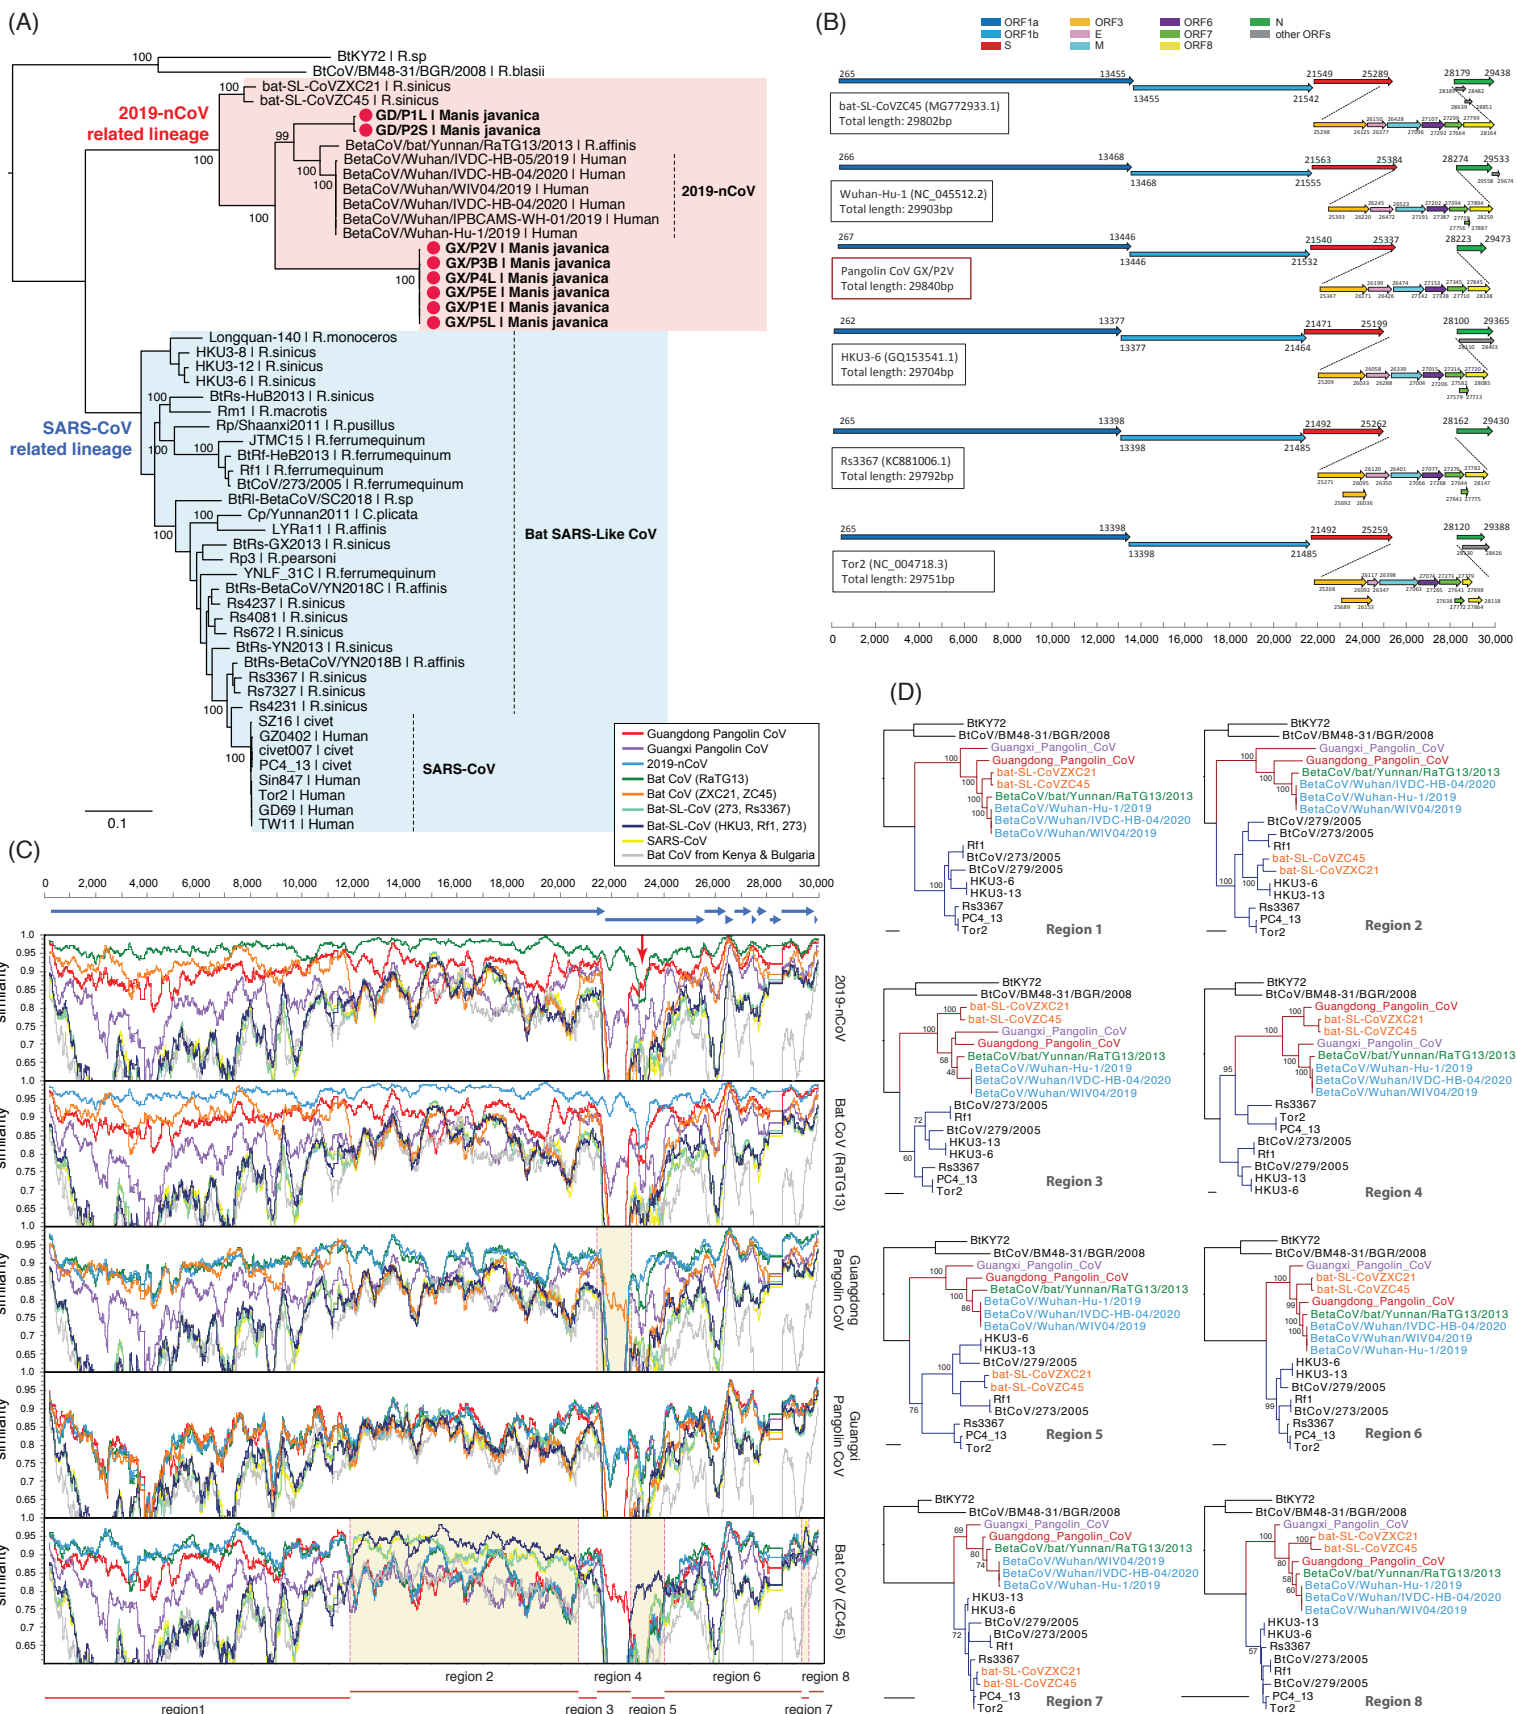

## Figure 2

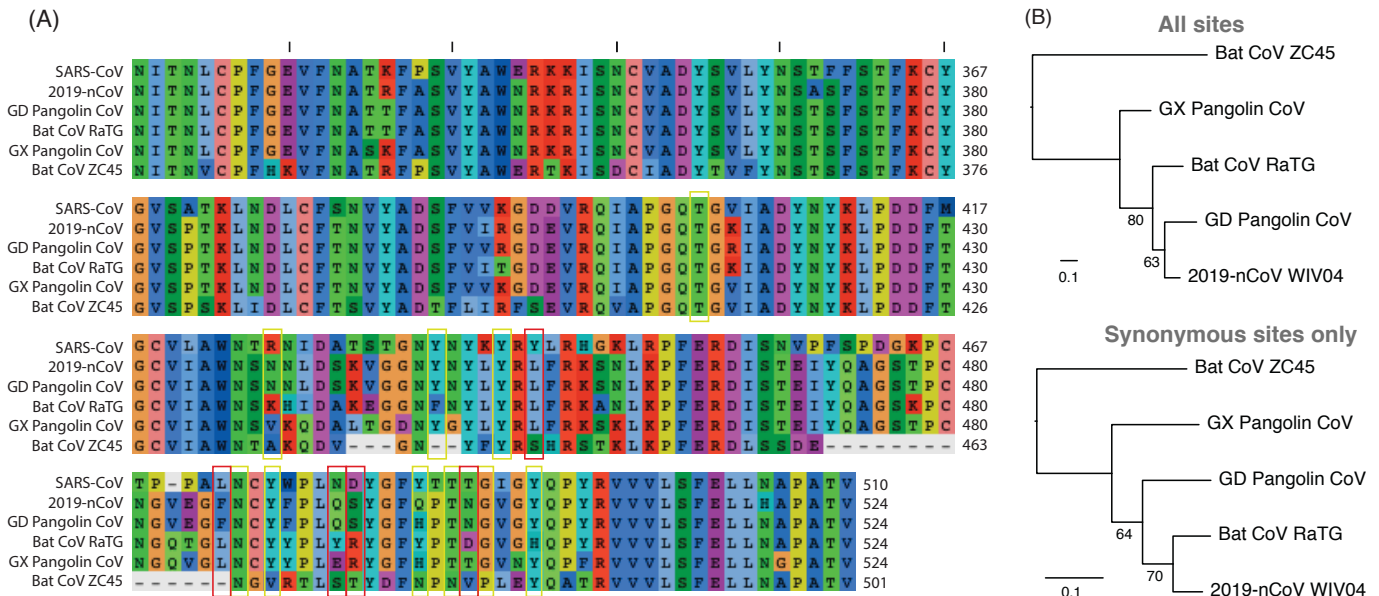

337 **Extended Data**

338

339 **Figure S1.** Microscopic image of the cytopathic effect in virus isolation using Vero E6. (A)  
340 Negative control of Vero E6 cell line. (B) Cytopathic effect seen in viral culture (5 days post  
341 inoculation).

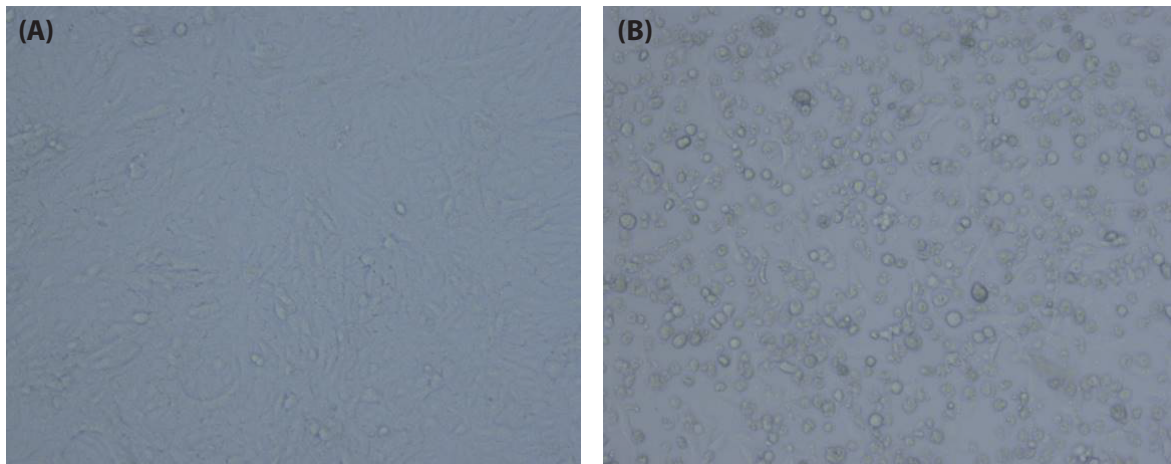

342



343 **Table S1.** High-throughput sequencing results of the samples with coronavirus reads

| Source location | Animal   | Sample type                                     | Sample number | Sequencing raw data ID                                                               |
|-----------------|----------|-------------------------------------------------|---------------|--------------------------------------------------------------------------------------|
| Guangxi         | Pangolin | Intestine                                       | GX/P1E        | Data submission in process; Identifier will be available as soon as it is generated. |
| Guangxi         | Pangolin | Virus isolate from intestine-lung mixed samples | GX/P2V        | Data submission in process; Identifier will be available as soon as it is generated. |
| Guangxi         | Pangolin | Blood                                           | GX/P3B        | Data submission in process; Identifier will be available as soon as it is generated. |
| Guangxi         | Pangolin | Lung                                            | GX/P4L        | Data submission in process; Identifier will be available as soon as it is generated. |
| Guangxi         | Pangolin | Intestine                                       | GX/P5E        | Data submission in process; Identifier will be available as soon as it is generated. |
| Guangxi         | Pangolin | Lung                                            | GX/P5L        | Data submission in process; Identifier will be available as soon as it is generated. |
| Guangdong       | Pangolin | Scale                                           | GD/P2S        | Data submission in process; Identifier will be available as soon as it is generated. |

344

345 **Table S2.** Acknowledgement of sharing of 2019-nCoV genome sequences from the  
 346 Virological.org and the GISAID databases. We gratefully thank the authors listed below for  
 347 sharing their genomic sequences of coronaviruses analyzed in this study.

| Accession ID                                 | Virus name                             | Location                                         | Collection date | Originating lab                                                                                                                                                 | Submitting lab                                                                                                                                                     | Authors                                                                                                                                                                                                                                                                                                                         |
|----------------------------------------------|----------------------------------------|--------------------------------------------------|-----------------|-----------------------------------------------------------------------------------------------------------------------------------------------------------------|--------------------------------------------------------------------------------------------------------------------------------------------------------------------|---------------------------------------------------------------------------------------------------------------------------------------------------------------------------------------------------------------------------------------------------------------------------------------------------------------------------------|
| Virological.org<br>sequence<br>(NC_045512.2) | BetaCoV/Wuhan-<br>Hu-1/2019            | China /<br>Wuhan                                 | 2019-12         | National Institute<br>for Communicable<br>Disease Control<br>and Prevention<br>(ICDC) Chinese<br>Center for Disease<br>Control and<br>Prevention (China<br>CDC) | National Institute<br>for<br>Communicable<br>Disease Control<br>and Prevention<br>(ICDC) Chinese<br>Center for<br>Disease Control<br>and Prevention<br>(China CDC) | Zhang,Y.-Z., Wu,F.,<br>Chen,Y.-M., Pei,Y.-Y.,<br>Xu,L., Wang,W.,<br>Zhao,S., Yu,B., Hu,Y.,<br>Tao,Z.-W., Song,Z.-G.,<br>Tian,J.-H., Zhang,Y.-L.,<br>Liu,Y., Zheng,J.-J.,<br>Dai,F.-H., Wang,Q.-M.,<br>She,J.-L. and Zhu,T.-Y.                                                                                                   |
| EPI_ISL_<br>402131                           | BetaCoV/bat/<br>Yunnan/<br>RaTG13/2013 | China /<br>Yunnan<br>Province<br>/ Pu'er<br>City | 2013-07-<br>24  | Wuhan Institute of<br>Virology, Chinese<br>Academy of<br>Sciences                                                                                               | Wuhan Institute<br>of Virology,<br>Chinese Academy<br>of Sciences                                                                                                  | Yan Zhu, Ping Yu, Bei<br>Li, Ben Hu, Hao-Rui Si,<br>Xing-Lou Yang, Peng<br>Zhou, Zheng-Li Shi                                                                                                                                                                                                                                   |
| EPI_ISL_<br>402121                           | BetaCoV/Wuhan/<br>IVDC-HB-<br>05/2019  | China /<br>Hubei<br>Province<br>/ Wuhan<br>City  | 2019-12-<br>30  | National Institute<br>for Viral Disease<br>Control and<br>Prevention, China<br>CDC                                                                              | National Institute<br>for Viral Disease<br>Control and<br>Prevention, China<br>CDC                                                                                 | Wenjie Tan, Xuejun<br>Ma, Xiang Zhao,<br>Wenling Wang,<br>Yongzhong Jiang,<br>Roujian Lu, Ji Wang,<br>Peihua Niu, Weimin<br>Zhou, Faxian Zhan,<br>Weifeng Shi, Baoying<br>Huang, Jun Liu, Li<br>Zhao, Yao Meng, Fei<br>Ye, Na Zhu, Xiaozhou<br>He, Peipei Liu, Yang<br>Li, Jing Chen, Wenbo<br>Xu, George F. Gao,<br>Guizhen Wu |
| EPI_ISL_<br>402120                           | BetaCoV/Wuhan/<br>IVDC-HB-<br>04/2020  | China /<br>Hubei<br>Province<br>/ Wuhan<br>City  | 2020-01-<br>01  | National Institute<br>for Viral Disease<br>Control and<br>Prevention, China<br>CDC                                                                              | National Institute<br>for Viral Disease<br>Control and<br>Prevention, China<br>CDC                                                                                 | Wenjie Tan, Xiang<br>Zhao, Wenling<br>Wang, Xuejun Ma,<br>Yongzhong Jiang,<br>Roujian Lu, Ji Wang,<br>Weimin Zhou, Peihua<br>Niu, Peipei Liu,<br>Faxian Zhan, Weifeng<br>Shi, Baoying Huang,<br>Jun Liu, Li Zhao, Yao                                                                                                           |

|                    |                                          |                                                 |                |                                                                                                                     |                                                                                                                     |                                                                                                        |
|--------------------|------------------------------------------|-------------------------------------------------|----------------|---------------------------------------------------------------------------------------------------------------------|---------------------------------------------------------------------------------------------------------------------|--------------------------------------------------------------------------------------------------------|
|                    |                                          |                                                 |                |                                                                                                                     |                                                                                                                     | Meng, Xiaozhou He,<br>Fei Ye, Na Zhu, Yang<br>Li, Jing Chen, Wenbo<br>Xu, George F. Gao,<br>Guizhen Wu |
| EPI_ISL_<br>402124 | BetaCoV/Wuhan/<br>WIV04/2019             | China /<br>Hubei<br>Province<br>/ Wuhan<br>City | 2019-12-<br>30 | Wuhan Jinyintan<br>Hospital                                                                                         | Wuhan Institute<br>of Virology,<br>Chinese Academy<br>of Sciences                                                   | Peng Zhou, Xing-Lou<br>Yang, Ding-Yu Zhang,<br>Lei Zhang, Yan Zhu,<br>Hao-Rui Si, Zhengli Shi          |
| EPI_ISL_<br>402123 | BetaCoV/Wuhan<br>/IPBCAMS-WH-<br>01/2019 | China /<br>Hubei<br>Province<br>/ Wuhan<br>City | 2019-12-<br>24 | Institute of<br>Pathogen Biology,<br>Chinese Academy<br>of Medical<br>Sciences & Peking<br>Union Medical<br>College | Institute of<br>Pathogen<br>Biology, Chinese<br>Academy of<br>Medical Sciences<br>& Peking Union<br>Medical College | Lili Ren, Jianwei Wang,<br>Qi Jin, Zichun Xiang,<br>Zhiqiang Wu, Chao Wu,<br>Yiwei Liu                 |

348

349 **Table S3.** GenBank accession numbers of coronavirus sequences used in this study.

| <b>Accession ID</b> | <b>Strain name</b>     | <b>Host</b>             |
|---------------------|------------------------|-------------------------|
| NC_004718.3         | Tor2                   | Human                   |
| AY313906.1          | GD69                   | Human                   |
| MK211377.1          | BtRs-BetaCoV/YN2018C   | <i>R. affinis</i>       |
| MK211376.1          | BtRs-BetaCoV/YN2018B   | <i>R. affinis</i>       |
| MK211374.1          | BtRI-BetaCoV/SC2018    | <i>R. sp</i>            |
| KY352407.1          | BtKY72                 | <i>R. sp</i>            |
| MG772934.1          | bat-SL-CoVZXC21        | <i>R. sinicus</i>       |
| MG772933.1          | bat-SL-CoVZC45         | <i>R. sinicus</i>       |
| KY417151.1          | Rs7327                 | <i>R. sinicus</i>       |
| KY417147.1          | Rs4237                 | <i>R. sinicus</i>       |
| KY417146.1          | Rs4231                 | <i>R. sinicus</i>       |
| KY417143.1          | Rs4081                 | <i>R. sinicus</i>       |
| KJ473816.1          | BtRs-YN2013            | <i>R. sinicus</i>       |
| KJ473815.1          | BtRs-GX2013            | <i>R. sinicus</i>       |
| KJ473814.1          | BtRs-HuB2013           | <i>R. sinicus</i>       |
| KJ473812.1          | BtRf-HeB2013           | <i>R. ferrumequinum</i> |
| JX993988.1          | Cp/Yunnan2011          | <i>C. plicata</i>       |
| JX993987.1          | Rp/Shaanxi2011         | <i>R. pusillus</i>      |
| KU182964.1          | JTMC15                 | <i>R. ferrumequinum</i> |
| KP886808.1          | YNLF_31C               | <i>R. ferrumequinum</i> |
| KF569996.1          | LYRa11                 | <i>R. affinis</i>       |
| KC881006.1          | Rs3367                 | <i>R. sinicus</i>       |
| DQ412043.1          | Rm1                    | <i>R. macrotis</i>      |
| DQ412042.1          | Rf1                    | <i>R. ferrumequinum</i> |
| GU190215.1          | BtCoV/BM48-31/BGR/2008 | <i>R. blasii</i>        |
| GQ153547.1          | HKU3-12                | <i>R. sinicus</i>       |
| GQ153543.1          | HKU3-8                 | <i>R. sinicus</i>       |
| GQ153541.1          | HKU3-6                 | <i>R. sinicus</i>       |
| FJ588686.1          | Rs672                  | <i>R. sinicus</i>       |
| DQ071615.1          | Rp3                    | <i>R. pearsoni</i>      |
| AY304488.1          | SZ16                   | civet                   |
| DQ648856.1          | BtCoV/273/2005         | <i>R. ferrumequinum</i> |
| AY572034.1          | civet007               | civet                   |
| AY502924.1          | TW11                   | Human                   |
| AY613948.1          | PC4_13                 | civet                   |
| AY613947.1          | GZ0402                 | Human                   |
| AY559095.1          | Sin847                 | Human                   |
| KF294457.1          | Longquan-140           | <i>R. monoceros</i>     |
| DQ648857.1          | BtCoV/279/2005         | <i>R. macrotis</i>      |

350

351 **Table S4.** Primers used for qPCR detection of pangolin associated coronavirus

|              |                           |
|--------------|---------------------------|
| pCov-Forward | AGGTGACGAGGTTAGACAAATAG   |
| pCov-Reverse | CCAAGCAATAACACAACCAGTAA   |
| pCov-Probe   | ACCCGGACAAACTGGTGTTATTGCT |

352

353 **Table S5.** Genomic comparison of 2019-nCoV with Bat-Cov RaTG13, Guangdong pangolin  
 354 CoV and Guangxi pangolin CoV.

|        | Bat-Cov RaTG13 <sup>#</sup>     |                  |                  | Guangdong pangolin CoV <sup>#</sup> |                  |                  | Guangxi pangolin CoV <sup>#</sup> |                  |                  |
|--------|---------------------------------|------------------|------------------|-------------------------------------|------------------|------------------|-----------------------------------|------------------|------------------|
|        | Length<br>bat/2019-<br>nCoV(bp) | nt<br>Identity % | aa<br>Identity % | Length<br>GD/2019-<br>nCoV(bp)      | nt<br>Identity % | aa<br>Identity % | Length<br>GX/2019-<br>nCoV (bp)   | nt<br>Identity % | aa<br>Identity % |
| ORF1ab | 21287/21290                     | 96.5             | 98.6             | 20076*/21290                        | 90.8             | 97.1             | 21266/21290                       | 84.8             | 92.5             |
| S      | 3852/3864                       | 92.9             | 97.7             | 3648/3864                           | 89.3             | 90.7             | 3804/3864                         | 83.5             | 92.5             |
| ORF3a  | 828/828                         | 96.3             | 97.8             | 828/828                             | 93.4             | 97.4             | 828/828                           | 86.9             | 89.3             |
| E      | 228/228                         | 99.6             | 100              | 228/228                             | 98.3             | 100              | 228/228                           | 97.4             | 100              |
| M      | 693/693                         | 95.7             | 99.5             | 693/693                             | 93.1             | 98.6             | 693/693                           | 91.6             | 98.2             |
| ORF6   | 186/186                         | 98.4             | 100              | 186/186                             | 94.6             | 96.6             | 186/186                           | 90.9             | 95               |
| ORF7a  | 366/366                         | 95.6             | 97.5             | 366/366                             | 93.4             | 97.5             | 366/366                           | 86.6             | 87.7             |
| ORF8   | 366/366                         | 96.9             | 94.9             | 366/366                             | 92.1             | 94.9             | 366/366                           | 81.5             | 86.8             |
| N      | 1260/1260                       | 96.8             | 98.8             | 1260/1260                           | 96.1             | 97.6             | 1254/1260                         | 90.9             | 94.1             |

355 <sup>#</sup>: Wuhan-Hu-1 2019-nCoV (NC\_045512.2) was used for comparison with Bat-CoV RaTG13

356 (EPI\_ISL\_402131), Guangdong pangolin CoV (merged of GD/P1L and GD/P2S), and Guangxi

357 pangolin CoV (GX/P5L)

358 \* partial sequence
